# Supplementary material for: Tuning of the thermal quenching performance of Bi3+-doped scheelite Ca(Mo/W)O4 solid solution phosphors
Source: Royal Society of Chemistry journal article supplement (doi:10.1039/d2dt02199d), 2022-01-01
Supplement: d2dt02199d1.pdf [file d2dt02199d1.pdf]

## Supporting Information

Tuning of thermal quenching performance of Bi<sup>3+</sup>-doped scheelite  
Ca(Mo/W)O<sub>4</sub> solid solution phosphors

Ran Xiao,<sup>a</sup> Ning Guo,<sup>a,\*</sup> Xiang Lv,<sup>a</sup> Qincan Ma,<sup>a</sup> Baiqi Shao,<sup>b</sup> and Ruizhuo Ouyang,<sup>a</sup>

<sup>a</sup> Department of Chemistry, University of Shanghai for Science and Technology, Shanghai 200093, P. R. China.

<sup>b</sup> State Key Laboratory of Rare Earth Resource Utilization, Changchun Institute of Applied Chemistry, Chinese Academy of Sciences, Changchun 130022, P. R. China.

\*Corresponding author: Tel.: +86-21-65711344; Fax: +86-21-65711344;

E-mail: [guoning@usst.edu.cn](mailto:guoning@usst.edu.cn)

Figure S1

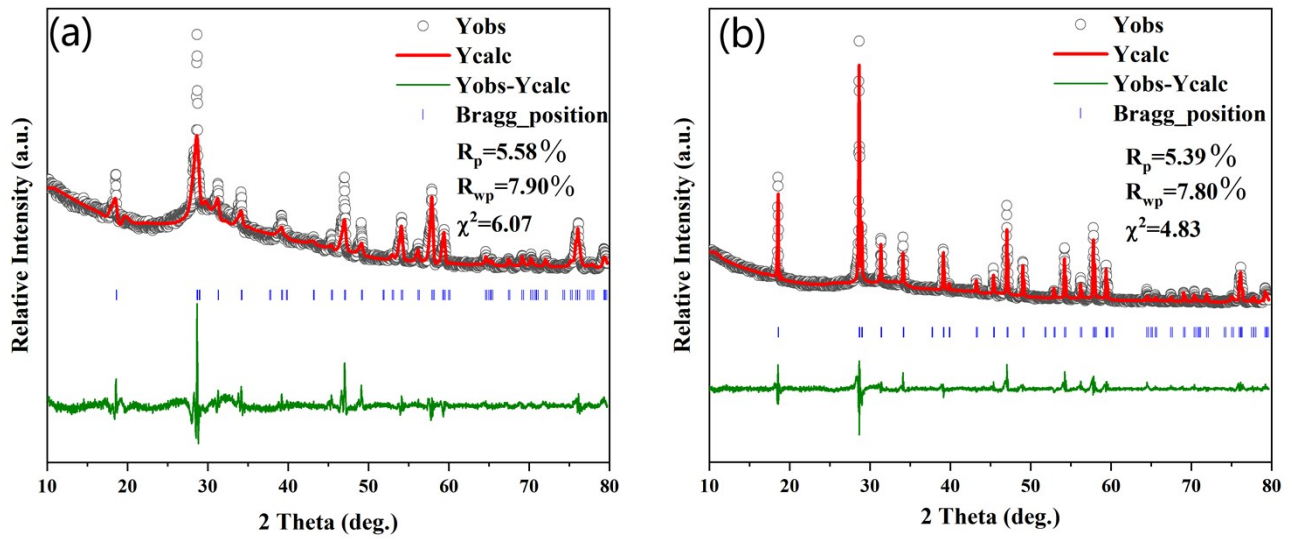

Figure S1 Rietveld refinement patterns for X-ray diffraction patterns of (a)  $\text{Ca}_{0.99}\text{Mo}_{0.5}\text{W}_{0.5}\text{O}_4:0.01\text{Bi}^{3+}$   
(b)  $\text{Ca}_{0.99}\text{WO}_4:0.01\text{Bi}^{3+}$ .

**Figure S2**

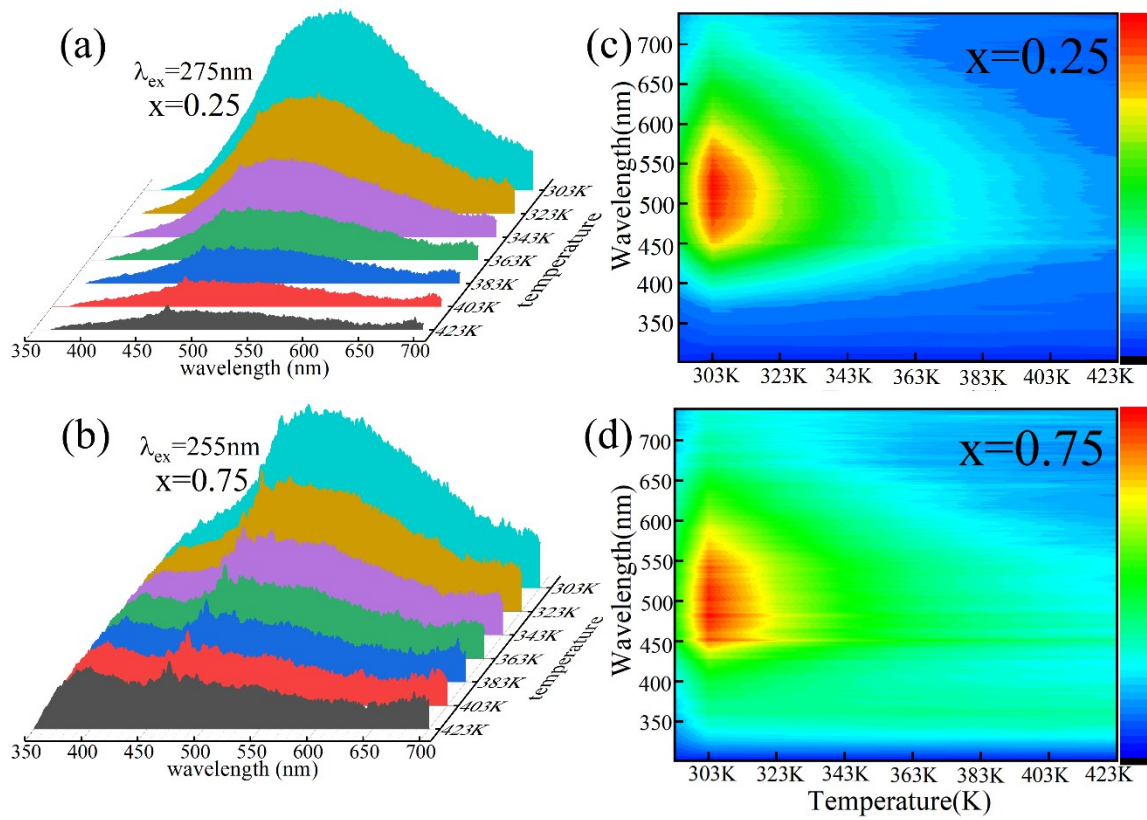

Figure S2 Emission spectra of (a, c)  $\text{Ca}_{0.99}\text{Mo}_{0.75}\text{W}_{0.25}\text{O}_4:0.01\text{Bi}^{3+}$  (b, d)  $\text{Ca}_{0.99}\text{Mo}_{0.25}\text{W}_{0.75}\text{O}_4:0.01\text{Bi}^{3+}$  at 303-423K.

**Figure S3**

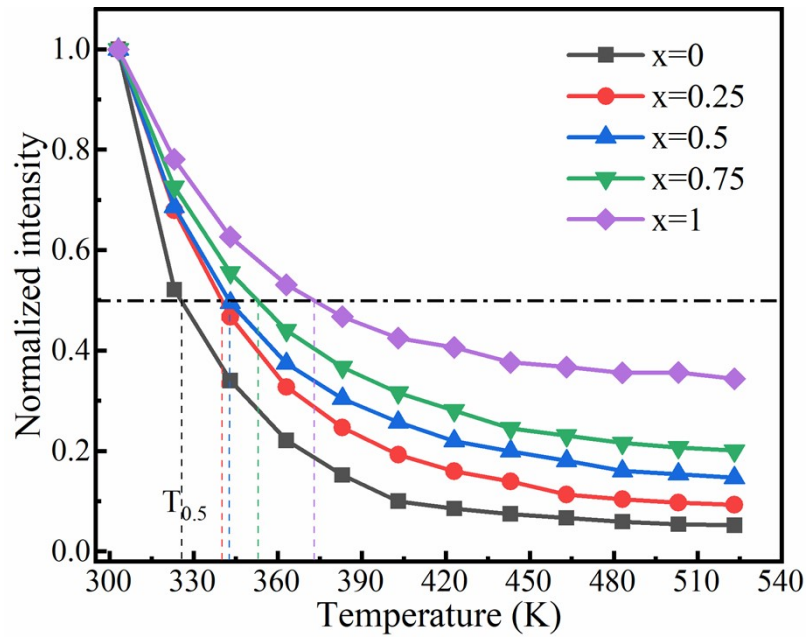

Figure S3 Normalized integrated intensity of  $\text{Ca}_{0.99}\text{Mo}_{1-x}\text{W}_x\text{O}_4:0.01\text{Bi}^{3+}$  ( $x=0-1$ ) at 303-523K

**Figure S4**

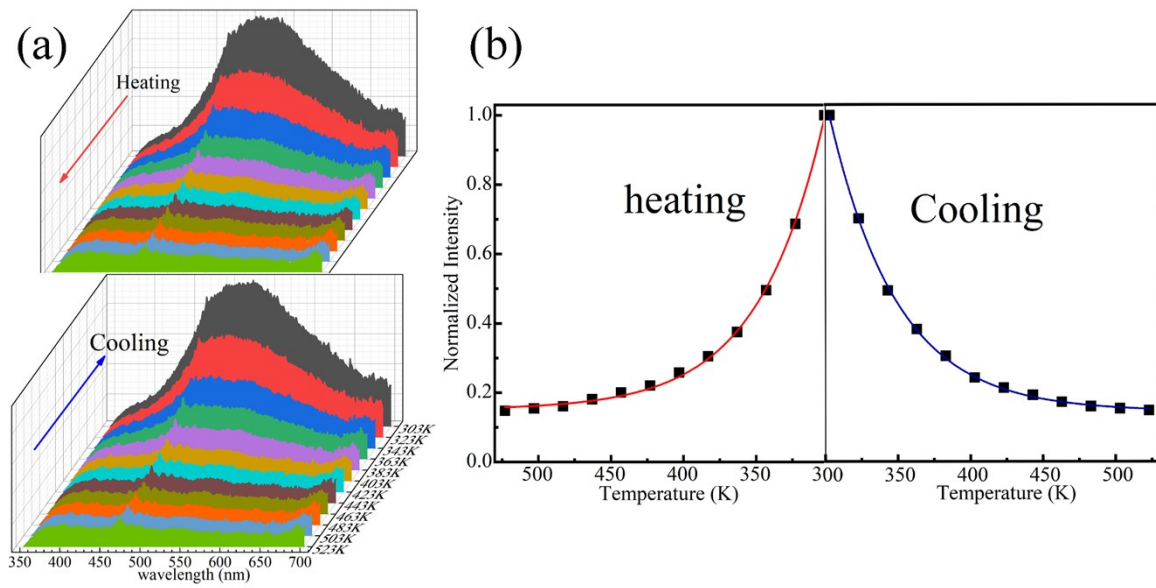

Fig. S4 (a) Emission spectra of  $\text{Ca}_{0.99}\text{Mo}_{0.5}\text{W}_{0.5}\text{O}_4:0.01\text{Bi}^{3+}$  solid solution on heating and cooling at 303-523K. (b) The fitting curve of the corresponding integrated intensity.

Figure S5

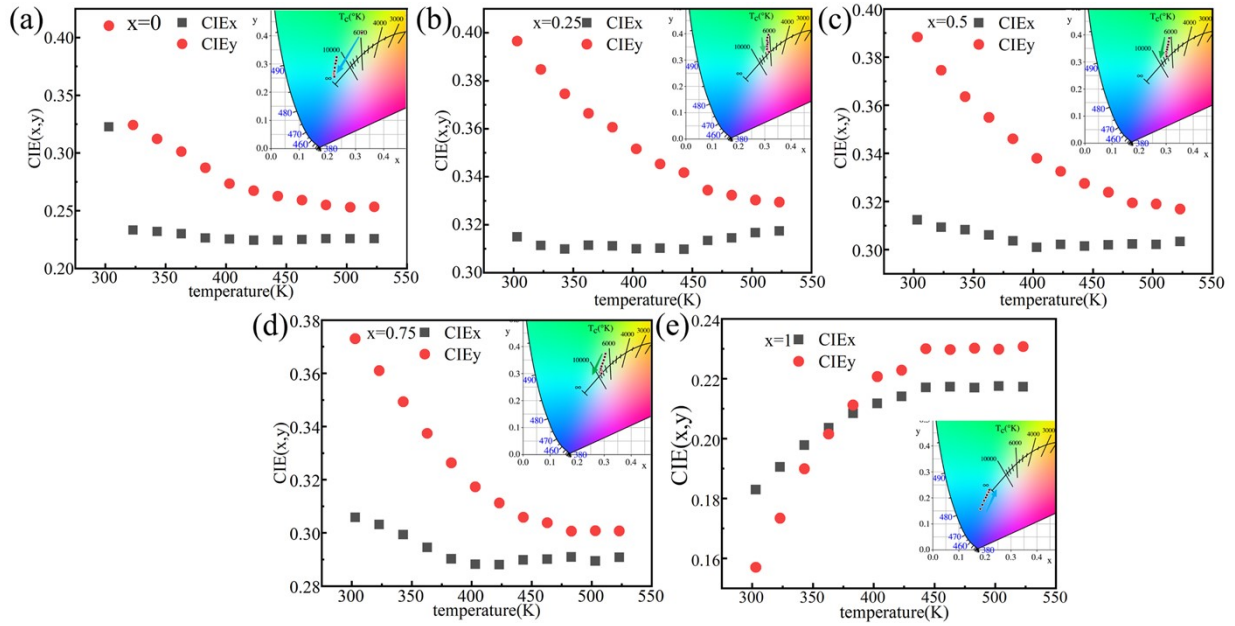

Figure S5 (a-e)  $\text{Ca}_{0.99}\text{Mo}_{1-x}\text{W}_x\text{O}_4:0.01\text{Bi}^{3+}$  ( $x=0, 0.25, 0.5, 0.75, 1$ ) in variable temperature chromaticity coordinates (x, y), and the insets are the corresponding CIE chromaticity diagrams.

**Figure S6**

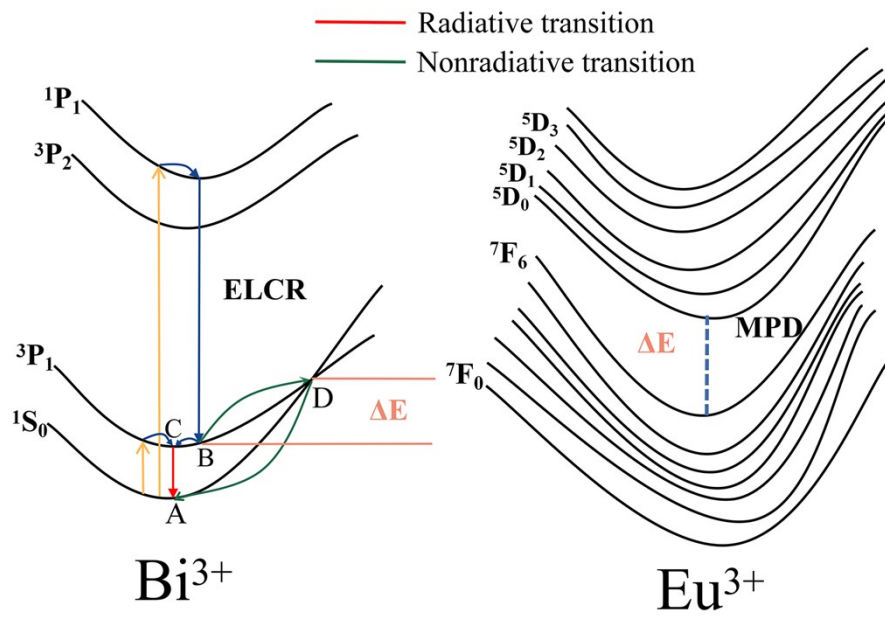

Figure S6 Schematic of the quenching mechanism for the  $\text{Bi}^{3+}$  activator and the MPD quenching for  $\text{Eu}^{3+}$ .

**Figure S7**

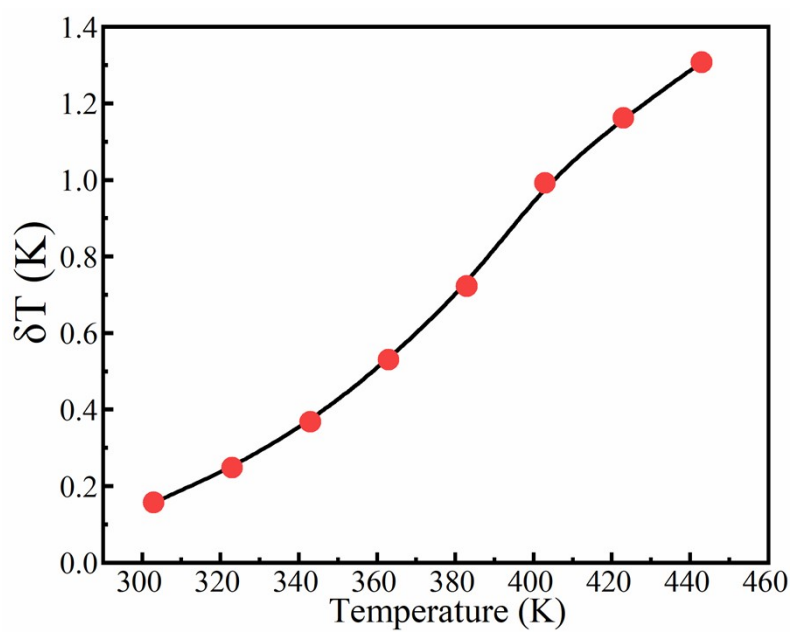

Figure S7 The temperature resolution of  $\text{Ca}_{0.985}\text{Mo}_{0.5}\text{W}_{0.5}\text{O}_4:0.01\text{Bi}^{3+},0.0025\text{Eu}^{3+}$ .



**Table S1** The relevant Rietveld refinement parameters and crystallo-graphic data.

| Parameter                          | Ca <sub>0.99</sub> MoO <sub>4</sub> :0.01Bi <sup>3+</sup> | Ca <sub>0.99</sub> Mo <sub>0.5</sub> W <sub>0.5</sub> O <sub>4</sub> :0.01Bi <sup>3+</sup> | Ca <sub>0.99</sub> WO <sub>4</sub> :0.01Bi <sup>3+</sup> |
|------------------------------------|-----------------------------------------------------------|--------------------------------------------------------------------------------------------|----------------------------------------------------------|
| Space group                        | I4 <sub>1</sub> /a                                        | I4 <sub>1</sub> /a                                                                         | I4 <sub>1</sub> /a                                       |
| a=b (Å)                            | 5.22294                                                   | 5.24020                                                                                    | 5.24801                                                  |
| c (Å)                              | 11.43149                                                  | 11.42373                                                                                   | 11.38946                                                 |
| α=β=γ (deg)                        | 90.000                                                    | 90.000                                                                                     | 90.000                                                   |
| Unit cell volume (Å <sup>3</sup> ) | 311.841                                                   | 313.692                                                                                    | 313.684                                                  |
| R <sub>p</sub> (%)                 | 4.99                                                      | 5.58                                                                                       | 5.39                                                     |
| R <sub>wp</sub> (%)                | 6.79                                                      | 6.70                                                                                       | 7.80                                                     |
| χ <sup>2</sup>                     | 3.77                                                      | 6.07                                                                                       | 4.83                                                     |

**Table S2** Several dual rare-earth doped optical temperature measurement materials of Sa and Sr for typical temperature sensors.

| Sensing materials                                                                                         | Excitation wavelength(nm) | Temperature range(K) | S <sub>r</sub> (%K <sup>-1</sup> ) <sup>1)</sup> | Sa (K <sup>-1</sup> ) | Ref.      |
|-----------------------------------------------------------------------------------------------------------|---------------------------|----------------------|--------------------------------------------------|-----------------------|-----------|
| SrY <sub>2</sub> O <sub>4</sub> :Bi <sup>3+</sup> ,Eu <sup>3+</sup>                                       | 330                       | 313-563              | 0.86                                             | 0.0433                | 1         |
| CaYZr <sub>2</sub> Al <sub>3</sub> O <sub>12</sub> :Bi <sup>3+</sup> ,Eu <sup>3+</sup>                    | 278                       | 297-573              | 0.664                                            | 0.00826               | 2         |
| LaScO <sub>3</sub> :Bi <sup>3+</sup> ,Eu <sup>3+</sup>                                                    | 308                       | 280-480              | 0.795                                            | 0.118                 | 3         |
| NaGd(MoO <sub>4</sub> ) <sub>2</sub> :Tb <sup>3+</sup> ,Pr <sup>3+</sup>                                  | 310                       | 303-483              | 2.05                                             | 0.097                 | 4         |
| LuNbO <sub>4</sub> : Tb <sup>3+</sup> ,Pr <sup>3+</sup>                                                   | 305                       | 283-493              | 1.26                                             | 0.024                 | 5         |
| NaGdF <sub>4</sub> :Yb <sup>3+</sup> ,Er <sup>3+</sup>                                                    | 980                       | 303-343              | 1.29                                             | 0.0365                | 6         |
| GdNbO <sub>4</sub> :Bi <sup>3+</sup> ,Eu <sup>3+</sup>                                                    | 308                       | 303-523              | 3.81                                             | 0.0367                | 7         |
| Ca <sub>0.985</sub> Mo <sub>0.5</sub> W <sub>0.5</sub> O <sub>4</sub> :Bi <sup>3+</sup> ,Eu <sup>3+</sup> | 265                       | 303-523              | 3.1713                                           | 0.06553               | This work |

## Reference

1. R. Wei, J. Guo, K. Li, L. Yang, X. Tian, X. Li, F. Hu and H. Guo, Dual-emitting SrY<sub>2</sub>O<sub>4</sub>:Bi<sup>3+</sup>,Eu<sup>3+</sup> phosphor for ratiometric temperature sensing, *Journal of Luminescence*, 2019, **216**, 116737.
2. Z. Zheng, J. Zhang, X. Liu, R. Wei, F. Hu and H. Guo, Luminescence and self-referenced optical temperature sensing performance in Ca<sub>2</sub>YZr<sub>2</sub>Al<sub>3</sub>O<sub>12</sub>:Bi<sup>3+</sup>,Eu<sup>3+</sup> phosphors, *Ceramics International*, 2020, **46**, 6154-6159.
3. D. Huang, Y. Wei, P. Dang, X. Xiao, H. Lian and J. Lin, Tunable color emission in LaScO<sub>3</sub>:Bi<sup>3+</sup>,Tb<sup>3+</sup>,Eu<sup>3+</sup> phosphor, *Journal of the American Ceramic Society*, 2020, **103**, 3273-3285.
4. Y. Gao, F. Huang, H. Lin, J. Zhou, J. Xu and Y. Wang, A Novel Optical Thermometry Strategy Based on Diverse Thermal Response from Two Intervalence Charge Transfer States, *Advanced Functional Materials*, 2016, **26**, 3139-3145.
5. Y. Wu, H. Suo, X. Zhao, Z. Zhou and C. Guo, Self-calibrated optical thermometer LuNbO<sub>4</sub>:Pr<sup>3+</sup>/Tb<sup>3+</sup> based on intervalence charge transfer transitions, *Inorganic Chemistry Frontiers*, 2018, **5**, 2456-2461.
6. J. Wang, H. Lin, Y. Cheng, X. Cui, Y. Gao, Z. Ji, J. Xu and Y. Wang, A novel high-sensitive upconversion thermometry strategy: Utilizing synergistic effect of dual-wavelength lasers excitation to manipulate electron thermal distribution, *Sensors and Actuators B-Chemical*, 2019, **278**, 165-171.
7. J. Xue, H. M. Noh, B. C. Choi, S. H. Park, J. H. Kim, J. H. Jeong and P. Du, Dual-functional of non-contact thermometry and field emission displays via efficient Bi<sup>3+</sup> → Eu<sup>3+</sup> energy transfer in emitting-color tunable GdNbO<sub>4</sub> phosphors, *Chemical Engineering Journal*, 2020, **382**, 122861.
